# Supplementary material
Source: Research Square preprint supplement (doi:10.21203/rs.3.rs-9093890/v1)
Supplement: Supplementary file 1 [file 3540bf6f85e211f9f144003b.pdf]

## **New Blood Test - YPAG Questionnaire**

The PERFORM and DIAMONDS studies aim to develop a new blood test to help us tell the difference between fever from a serious bacterial infection or other causes.

Serious bacterial infections might need medical attention and antibiotics, but other causes might get better without specific treatments (for example the Flu).

A new test may be able to diagnose people with serious illness quicker, and not give unnecessary antibiotics to people who do not need them

We would like to find out what you think of such a new test, and what you would value most.

The questionnaire is anonymous, so any information you give cannot be tracked back to you!

Thank you for helping us!

1. What do you value most in the children's emergency department (paediatric A&E/paediatric ED)?

Please tick all the items that you value

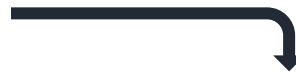

|                                                     |  |
|-----------------------------------------------------|--|
| Being seen immediately on arrival                   |  |
| Unnecessary waiting                                 |  |
| Waiting times - no long waits                       |  |
| Efficiency: whatever is meant to happen, happens    |  |
| Explanation / updates while waiting                 |  |
| Feeling safe                                        |  |
| Clear signage                                       |  |
| Examination by doctor or nurse                      |  |
| Seeing an experienced doctor / nurse / consultant   |  |
| Scans / x-rays / blood tests                        |  |
| Medication                                          |  |
| Pain relief (soon)                                  |  |
| Expert advice                                       |  |
| Good Communication                                  |  |
| They know who I am                                  |  |
| Being listened to                                   |  |
| Knowing who to talk to                              |  |
| Clear plan (knowing what's going to happen and why) |  |
| Reassurance                                         |  |
| Access to drinks / water / food                     |  |
| Clean toilet                                        |  |
| Cleanliness / hygiene                               |  |
| Comfortable place to wait                           |  |
| Sockets / phone or tablet charging area             |  |
| Play area / Toys                                    |  |
| Privacy / quiet                                     |  |
| Feeling safe                                        |  |
| Clear information / plan when leaving hospital      |  |
| Knowing what follow-up necessary                    |  |
| Knowing when to come back                           |  |

2. What do you value most in the children's emergency department (paediatric A&E/paediatric ED)?

Now pick your TOP 6! (1= first choice, 6= last choice)

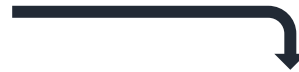

|                                                     |  |
|-----------------------------------------------------|--|
| Being seen immediately on arrival                   |  |
| Unnecessary waiting                                 |  |
| Waiting times - no long waits                       |  |
| Efficiency: whatever is meant to happen, happens    |  |
| Explanation / updates while waiting                 |  |
| Feeling safe                                        |  |
| Clear signage                                       |  |
| Examination by doctor or nurse                      |  |
| Seeing an experienced doctor / nurse / consultant   |  |
| Scans / x-rays / blood tests                        |  |
| Medication                                          |  |
| Pain relief (soon)                                  |  |
| Expert advice                                       |  |
| Good Communication                                  |  |
| They know who I am                                  |  |
| Being listened to                                   |  |
| Knowing who to talk to                              |  |
| Clear plan (knowing what's going to happen and why) |  |
| Reassurance                                         |  |
| Access to drinks / water / food                     |  |
| Clean toilet                                        |  |
| Cleanliness / hygiene                               |  |
| Comfortable place to wait                           |  |
| Sockets / phone or tablet charging area             |  |
| Play area / Toys                                    |  |
| Privacy / quiet                                     |  |
| Feeling safe                                        |  |
| Clear information / plan when leaving hospital      |  |
| Knowing what follow-up necessary                    |  |
| Knowing when to come back                           |  |

**Imagine you had a fever and you want to know if you are seriously ill or not**

3. Do you think this test should be available directly to patients (like a test you buy at a pharmacy)?

- YES
- NO

4. Do you think this test should only be available from medical centres (like blood tests at a GP)?

- YES
- NO

5. Where would you like to be able to get this new test?

*Tick any box if YES*

- Ordered off the internet
- Supermarkets
- Pharmacy
- GP or Acute Care Centre
- Emergency Department or Hospital

6. What kind of test would you prefer?

*Rank 1 to 3, where 1 = favourite, 3= least favourite*

|             |  |
|-------------|--|
| Blood test  |  |
| Saliva test |  |
| Urine test  |  |

7. If it was a blood test would you like it to be

*Pick one option*

- A fingerprick test
- A venous sample

**If you had the test done, and it shows you were NOT seriously ill**

8. Would you still like to see a doctor or nurse?

YES

NO

9. Why?

*Enter/write your comments in the box*

10. Do you think using a new test would change how doctors or nurses explain why you are sick?

*Enter/write your comments in the box*

11. Any other comments?

*Enter/write your comments in the box*
